# Supplementary material
Source: Springer Nature journal article supplement (https://www.springermedizin.de/resource/supplementary/13058_2013_3369_MOESM9_ESM.pdf/9703970)

PyV mT/GTRosa

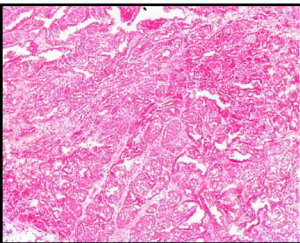

PyV mT/  
Cre recombinase

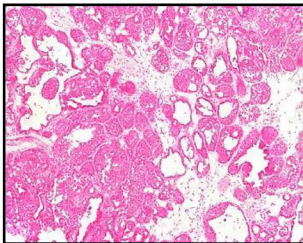

PyV mT/  
Cre recombinase/  
GTRosa

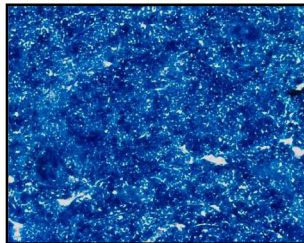

rtTA/MIC/GTRosa  
(+Dox)

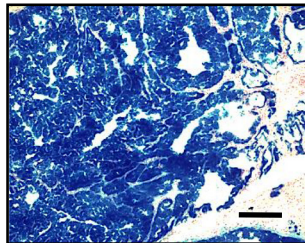

Supplement: MOESM9 [file 9703970]
